# Supplementary material
Source: PubMed Central journal article supplement (PMC7774895)
Supplement: develop-147-192948-s1.pdf [file develop-147-192948-s1.pdf]

## Supporting Information

### Supplemental Tables

**Table S1. miRNA mapping**

| Sample                   | # Total    | # Mapped   | Rate  |
|--------------------------|------------|------------|-------|
| mouse_MAX10.5_1.cutadapt | 8,285,943  | 5,729,779  | 0.692 |
| mouse_MAX10.5_2.cutadapt | 9,396,466  | 7,842,924  | 0.835 |
| mouse_MAX11.5_1.cutadapt | 16,406,467 | 12,318,940 | 0.751 |
| mouse_MAX11.5_2.cutadapt | 20,784,494 | 17,406,631 | 0.837 |
| mouse_MAX12.5_1.cutadapt | 20,971,137 | 18,758,701 | 0.895 |
| mouse_MAX12.5_2.cutadapt | 17,777,426 | 15,336,544 | 0.863 |
| mouse_MAX13.5_1.cutadapt | 3,664,072  | 3,284,924  | 0.897 |
| mouse_MAX13.5_2.cutadapt | 4,395,308  | 4,078,095  | 0.928 |
| mouse_MAX14.5_1.cutadapt | 11,650,387 | 10,875,216 | 0.933 |
| mouse_MAX14.5_2.cutadapt | 28,728,299 | 25,273,975 | 0.880 |

**Table S2. Differentially expressed nodes**

| Molecules     | E11.5 vs E10.5 | E12.5 vs E11.5 | E13.5 vs E12.5 | E14.5 vs E13.5 |
|---------------|----------------|----------------|----------------|----------------|
| <b>Genes</b>  | 466            | 470            | 414            | 70             |
| <b>TFs</b>    | 23             | 20             | 13             | 1              |
| <b>miRNAs</b> | 13             | 11             | 34             | 10             |

**Table S3.** The detailed information of miRNA-target databases for mice

| Category  | Database   | Version                     | # Total Pairs | # miRNAs | # targets |
|-----------|------------|-----------------------------|---------------|----------|-----------|
| Validated | miRTarBase | Release 7.0: Sept. 15, 2017 | 40,681        | 959      | 7280      |
| Predicted | miRanda    | August 2010 Release         | 631,947       | 238      | 18,779    |
|           | PITA       | version 6 (31-Aug-08)       | 143,635       | 491      | 9,239     |
|           | TargetScan | Release 7.2, August 2018    | 378,188       | 580      | 15,044    |

**Table S4.** Regulation pairs in the databases

| <b>Regulation type</b> | <b># Genes</b> | <b># TFs</b> | <b># miRNAs</b> | <b># Pairs</b> |
|------------------------|----------------|--------------|-----------------|----------------|
| TF-gene                | 1141           | 435          | N/A             | 121,746        |
| TF-miRNA               | N/A            | 432          | 789             | 110,246        |
| miRNA-gene             | 6,468          | N/A          | 778             | 21,970         |
| miRNA-TF               | N/A            | 343          | 464             | 2176           |

## Supplemental Figures

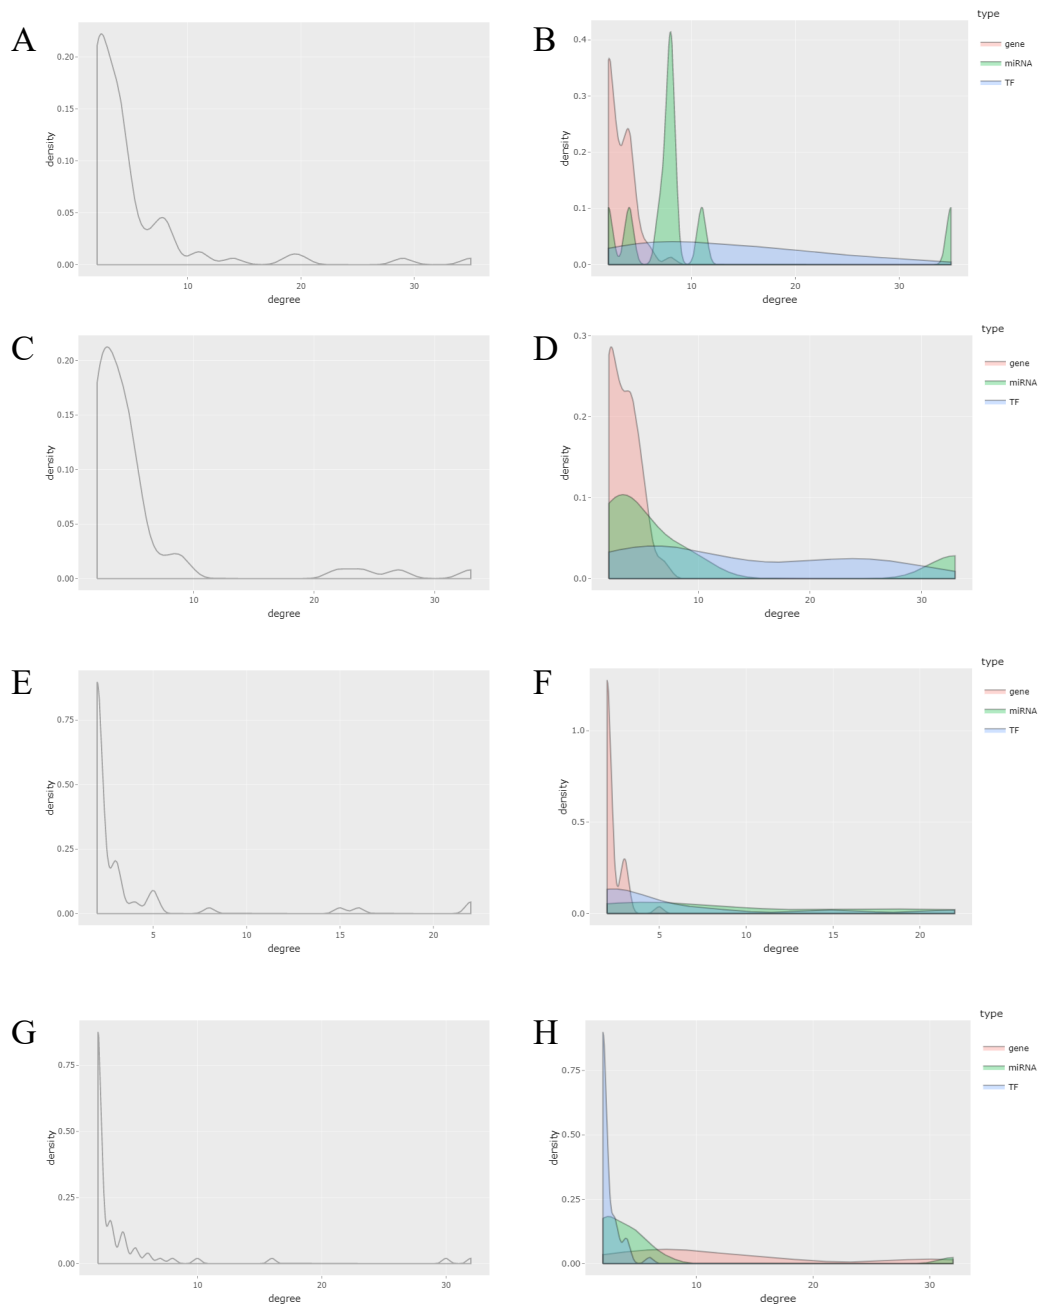

**Figure S1.** Distribution of nodes in the regulatory network from (AB) E10.5 to E11.5, (CD) E11.5 to E12.5, (EF) E12.5 to E13.5, and (GH) E13.5 to E14.5. Line in red correspond to degree distribution of genes, line in green correspond to degree distribution of miRNAs, and line in blue correspond to degree distribution of transcription factors.
